# Supplementary material
Source: PubMed Central journal article supplement (PMC2740591)
Supplement: supp_M109.013458_suppdata.pdf [file supp_M109.013458_suppdata.pdf]

SUPPLEMENTAL FIGURES FOR

CRYSTAL STRUCTURE OF IODOTYROSINE DEIODINASE, A NOVEL FLAVOPROTEIN RESPONSIBLE FOR IODIDE SALVAGE IN THYROID GLANDS

Seth R. Thomas<sup>1,2</sup>, Patrick M. McTamney<sup>1</sup>, Jennifer M. Adler<sup>1</sup>,  
Nicole LaRonde-LeBlanc<sup>1,2</sup> and Steven E. Rokita<sup>1</sup>,

From the Department of Chemistry and Biochemistry<sup>1</sup> and the Center for Biomolecular Structure and Organization<sup>2</sup>,  
University of Maryland, College Park, Maryland 20742 USA

Address correspondence to Nicole LaRonde-LeBlanc, Department of Chemistry and Biochemistry, University of Maryland, College Park, Maryland 20742 USA. Fax 301-314-0386; E-mail: nlaronde@umd.edu and Steven E. Rokita Department of Chemistry and Biochemistry, University of Maryland, College Park, Maryland 20742 USA. Fax 301-405-9376; E-mail: rokita@umd.edu

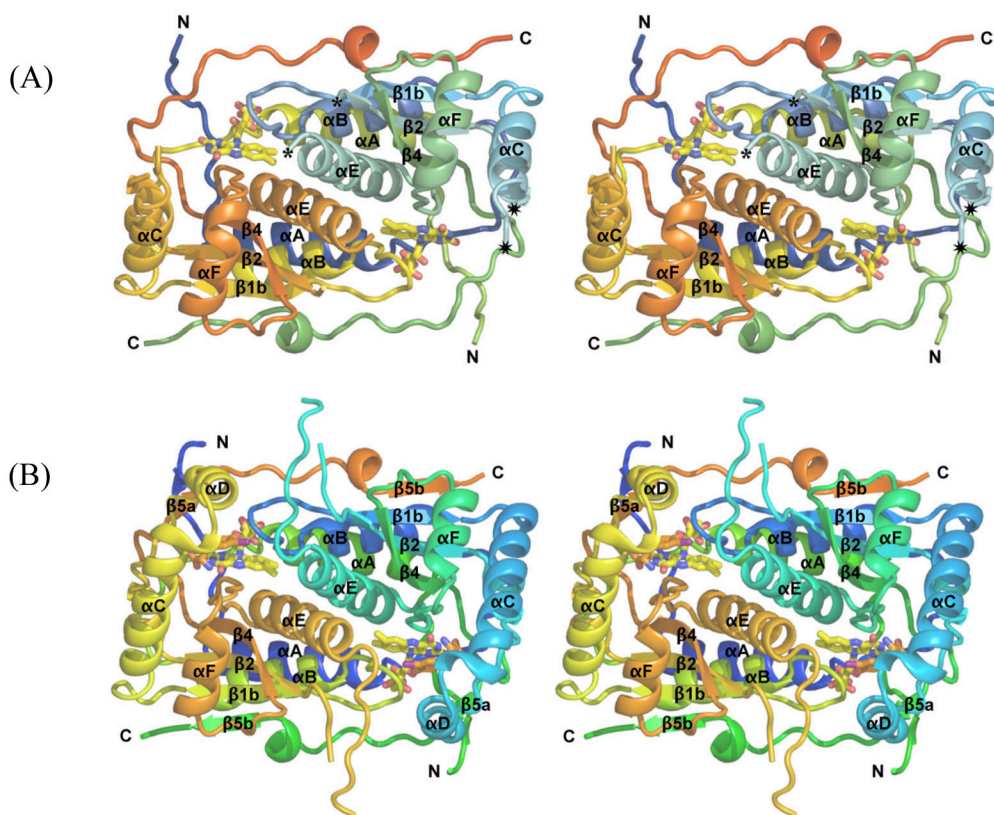

Figure S1. (A) An overall stereo view of IYD and (B) IYD·MIT colored to differentiate between secondary structural elements.

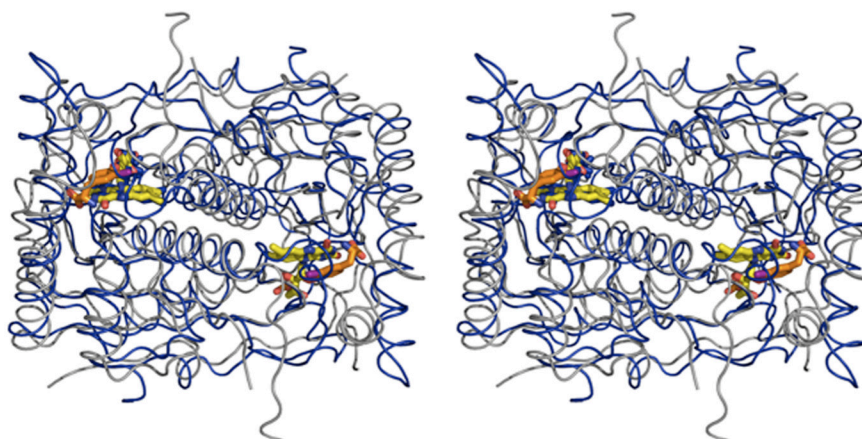

Figure S2 A stereo view of the structural alignment of IYD·MIT (grey) and BluB (blue).
